# Supplementary material for: Physiological Functions of the COPI Complex in Higher Plants
Source: PubMed Central journal article supplement — Mol Cells. 2015 Oct 2;38(10):866–75. doi: 10.14348/molcells.2015.0115 (PMC4625068; doi:10.14348/molcells.2015.0115), 2015-10-02
Supplement: molce-38-10-866-supple.pdf [file molce-38-10-866-supple.pdf]

**A**  $\beta$ '-COP

ATGGATATTGACAAGTTTGTATTCAGGGACTGTTTGCATCTGGAACCTACCAGACCCAGTTAGTTCAGCTAAGTTTATACCACGCAAGCAATGGGTTGGT  
 CTGGTCTGATGACATGTTTATTCGTTTACAATTAACAACACCATTGGATAAAGTTAAAGTATTCGAGGCACACACAGATTATATTAGGTGTGGCTGT  
 CCATCTACACTACCTTATGTGCTGTCATCTGATGACATGCTAATAAAGCTCTGGGATTGGGAGAAAGGGATGGTTATGCACCTCAAAATTTGAAGGT  
 CATTCCCATTATGTGATGCAAGTACCTTTAATCCAAAAGACACCAACTCTTTGCTAGTGCCTCCCTTGATCGGACTATAAAGATCTGGAACCTGGCT  
 CTCTGACCCAACTTCACTCTGGACGCTCATCTTAAAGGGTTAATTGTGTAGACTATTTCACTGGGGGTGATAAACCCATCTAATTACTGGTTCTGA  
 TGATCACACTGCTAAGGTGTGGGACTATCAGACAAAAGTTGTGTCCAGACTCTTGACGGCCACACACAATGTCTCAGCTGTATGTTTTCATCCTGG  
 TCTTCCAATTATAATTACAGGTTCTGAAGATGGTACTGTTTCGATATATGGCAGCAACCACTTATAGACTTGAGAACACTTTGAATTTAGGCTTGAAGAG  
 TATGGGCAATTGGTTACATGAAACACTCAAGGAGGGTTGTGATTGGTTATGATGAGGGAACCATCATGGTAAACCTTGGTAGAGAAAGTACCTGTTGCCA  
 GTATGGATAACAGTGGAAAAGTTTATTTGGCTAAGCACAATGAAGTTACAGACTTTAACATCAAGAGTATCGGGGCAAGATTGAAGTCCGCTGATGGAG  
 AGAGACTGCCCTTTGGCTGTCAAGGAAATGGGAACCTTGTGACCTCTACCCACAAGCTTGAAGCATAACTCAAAATGGAAGGTTTGTCTGCTTTGGGAG  
 ATGGAGAATATATCATATATACCCTCTGGCTGGAGAAATAGGTCATTTGGCTCAGCTCTGGAATTTGTTGGTCTTGGATGGAGAATATGCTGTGAG  
 GGAAAAGTCTCAAAGATTAAAGATCTTCAGCAAAAATTTCCAGGAGAAGAAGAGCATCCGGCCCTACTTTCTCTGCTGAGCCGCTATGCTGGTGGTATTTA  
 TTGGCAATGTGCTCGAATGATTTCAATTTGTTTCTATGATTGGCTGACTCGAGGTTGATACGGCGAATCGATGTTAATGTCAAAAATCTACTGGGCGG  
 ACAGCTGGTATCTTGAAGTCAATTTGAAGTGTAGTGCATCTTACATCTTAAAGTATAATCGAGATGTTGCTCTGCACATTTTGTGATGCAATGCAAT  
 AGATGAACAAGGTTTGAAGAAGCTTTGAAGTCTTAAAGAGATAAATGAACGGTCCGGAAGTGGGTTGGGGATTGCTTCAATTAACAATAAT  
 TCTTCTGGAGACTTAACTATTGTGTTGGGGTGGAGTACCACAATGTTTCACTTGACCGCCCATGTACCTACTCGGATACCTTGTCAATCAGAGC  
 AGGGTTTTCTGAATTACAAAGAAATTTAAATGCTGGGATATCTACTCTTGGCTTGAATGAGTACAAGACACTTGTGATGCGTGGCAGCTGGGATA  
 GAGCAATGAGGCTTACCATCAATTTCTAAGGAGCATCACACAGTGTGGCGCTTTCTTGAATCACGTGGAATGATAGAGGAAAGCATAGAAAGTTG  
 CTACTGACCTTGAAGTGTGAACTAGCCATACAGCTGGTAAATAGATATGCAAAAGGAAATTTGCCGTAGTGGCACTGCAATGCAATGCAATGCAAT  
 AGCAGTTGGGTGACCTAGCCATGTCTAGTGAAGGCTTGAAGAGCAGAGGAAATGTTGAAGCATGCAAAATGACTTGAGTGGTGTGCTACTCTTAT  
 CTCTTTAGGAGATGCTGAAGAAATAACTGAACTAGCATCTTTGCAAAAAGAACCGGAAAAACAATGTTGCATTTCTTGTGATGTTCTGTTGGGTAA  
 AGGGTACTGCTCAAAGATTAAAGATCTTCAGCAAAAATTTCCAGGAGAAGAAGAGCATCCGGCCCTACTTTCTCTGCTGAGCCGCTATGCTGGTGGTATTTA  
 ATCAATTTGGAGAAAAGGACTCAGTAAGGTTAACCAGAAAAGCTGCAAGAAAGCTTTGGCTGATCCTGAAGAAATCCTAACTTGTGAGCACTGGCAAA  
 AGCAGATCTTGAAGTGTGAACTAGGTTGCGGAGGAAAGGGGTATACACCCGAGCGGCAAGATTAGGAAATTTGCTGTAGACCAACTGCAATCCTG  
 TAGAAGCTTTAGCAACATGAGAGTGGATGAAGAACCTTGAAGATGAGAGTGGATCATGAGGTTGCAGAACAGAAATGGTGTGAGGTGCAAGAA  
 CCGGGTGAAGATGACATTAACAAGAGGGCCAAAGAGGCTGTTGTTGGTGGATGCTGACTACTGATGGTGCAGTACTCGTTAATGAAACAGAGG  
 TGACCAAGAGTGGGTACGAATCTGAAGGAAACCTTTACACCACGCTATTAGGTTGACCCAAGACAGATGGTCCAGTTGTTCTGCTGCCCTTAAAT  
 GGACAGTTTAAAGGACCGGATGCTGTTCTGCCAGTGGTGTGA

**B**  $\gamma$ -COP

ATGGCTCAGCCTCTGGTGAAGAAGGACGATGATCGGATGACGAAATGGACTACTCCCAATTTCTGGGGATTGAGAAGGGTGTCTTCTCAGGAAG  
 CTAGGGTTTTCAATGATCCTCAATTTGGATGCACGGAGATGCTCAGAGGTCATTACGAAGCTTCTCTATCTTGAATCAGGGGAGTCAATTTACAAG  
 GCTGAGGCTACAGGAGTCTTCTTGGTGTACAAAACTCTTTCAGTCAAAGGATATTGGTCTCAGGAGAATGGTGTGATGATGATGATGATGATGATGAT  
 CCCTCCGACAGCAGGTCATCATTGTACGAGCTCTCTTATGAAGGACATGAATAGCAGAACTGATATGATCGGGCAAACTGCTTGTGCTCTTTG  
 TCGAATCACAGATGGGAAAGTCTCACCCAAATGAGAGATACATGAAACAAGCCATTGTTGACAAAACCCCTGTTGTTGCAAGTCCGCTGTTGTA  
 GTGGAATCCATTTGCTTACAGCAAAATCCAGAAATTTGAAAAGATGGAGCAATGAGGTACAGGAAGCTGTTCAATCAAGGGCAGCTCTTGTTCAGTTC  
 CATGCACTGCCCCTGTCACACAGATTCGACAAAATGACCGTTTAGCTGTTAGCAAGCTAGTTACCAGTTGACAAAAGGAAAGTCCCGCTCACTCT  
 AGCTAGCTGCTTTGATTCGTTACTAGTCAAGTTAAGAGAATCTGGCAATAGCCAAACAGGAGATCGTCCATTTCTGACTATTAGAGAGTTG  
 CCTTCTGACAAAAGTGAATGGTATTTTTGAAGCAGCCAGGCAATCACAGAGCTTAGTGGTGTGACTAATAGAGAATTAACGCCTGCTTACTACTG  
 TTCTACAGCTCTTTGAGCTCTTCAAGCCAGTCTTAGGTTGCTGCTGCTGCTGCTGCTGCTGCTGCTGCTGCTGCTGCTGCTGCTGCTGCTGCTG  
 ACTGCAATATCGATATGGAGAGCTTGAATTTCTGATCAAAAATAGGAGCATTGCAACTTTGGCCATCACAACCTACTCAAGACTGGGAATGAATCAAGC  
 GTTGATCGTCAATGAAGCAGATTACTAATCTCATGTCCGACATTGCTGATGAGTTAAGATAGTGGTGTGAGAAGCAATAGATCATTGTTGTTGAAA  
 TTCCCTCAAGTATGATCTTGAATTTCTTGAAGCAATTTTGAAGCAATGAGCCCTCGAGGCAAGGTTGATTTGAGTACAAGAAAGGCTTGAATTTGAT  
 TCCTGATAGAGATATCCAGATGCCAAAGAAAGTGGGCTGCTTCACTTGTGTAATCATTGAGGACTGTGAATTCACATATCTTCTACGCAGATGA  
 TACATTTCTTGAAGTGAAGGACCTAAGACCTCTGACCCCACTAAGTACATACATATATAACCCGGTGATACTTGAAAAATGCAACAGTTCGG  
 GCCAGTGCAGTGCACCTTAGCGAAGTTGGTGCCTTGGTGTGATTCAATAAGCCTCGTATATTTGTGCTGTTGAAACGTTGTCTGTTGACAGTGTG  
 GATGAGGTTGCTGACCCGTCGAACACTTACTTGAATACCCCTTGGAGGTGATGGTGCAGTTGTTGAAACTGATGAAGAGGTGAAGAAAGTCTTTTGG  
 TTCACCTGGCGTCCCTCAACCAATCTGAAAACAAGTTTGAAGCAATGAGCCCTCGAGGAGCCATTTGACATTCATTCTGACCTAAGGAAAGTGA  
 AATCTCAACCTTGTGAGAGAAGAAAGCACCCTGAAAAGGCAACCGGTTGGCTGCTCCTCTGTTGGCTCCCACTTCCACTGTTGATGCGTATGA  
 AAGGTTACTCCTCTTGAAGTGAAGGATTTGCCAGTTATGAAAAGCTTTCAAGTACTGCAACTGCGCCAGTGGAGCTTACAGAACTGAACAGAAATGCAAGT  
 TAACGTTGCAAGCACAATTTTGAACATCATATCGTGTCCAGTACAACCTGCACCAACACTATCTGAGCAATGCTGGAGAATGCTCACTGTTATAGT  
 AGATGCTCTGACGCAGAGGAAATTTCTGAAGTAGCATCCAACCTCTCAAGTCCCTGCTTATGATACCCAGGGCAACATTTGTGACTTTTGA  
 AACCAAGAGGAGTCCCTGCTGTTGGGAAATTTCAACACATGTTGAGGTTCACTCGTTAAAGAGGTTGATCCATCTACTGTTGAGGCTGAAGATGATGGC  
 GTCGAAGATGAATACCAGCTAGAAAGCCTTGAAGGCTTTGAGCAGATTATGCTGTAAGGATAGGAGTATCCAATTTAGGAATGCCTGGGAGAGTTT  
 GGGACCAAGATTGAAAAGGTTAGATGAATAGTCTTGGACCAAGGAAAGCCTTAGCTGAAGCTGTAATACAGTCAATGACCTACTGGCATGCA  
 CCTTGGAGGGCACTGAGGTTGCCAAGCAATCAAGATCGCACACATGTTATATCTGGTGTGTTACCTTGGTGGTGAAGGTTCTGTTGCGTT  
 GTCAATTTGGAGTGCATGGGCAAGGAGGTTGCAATGAAACTGGCTGTTAGGTTGAAAGATATATCTGTCAGTGTGCAATTCATGAAATTTGTTGCA  
 GTGGCTAA

**C**  $\delta$ -COP

ATGGTGTCTTCCGGCTCCGATAATTTCTAAATCTGGCAAGCACTTGTCTCGAGGCAGTTTGTGATATGCTCGTATAAGAATGAAGGGTATCTT  
 GCAGCTTCCCAAAATTTGGTGGTACAGGAAAGCAGCATACATATATTGAGACTGACAATGTGCGATATGTTTATCAACCGATAGAGTCTTTGACTTG  
 CTACTTGTGACCAACAAACAGAGCAACATTTGAAGATCTTGAAGACTGAGGCTGCTGCTAAACTAGTGCCTGAATATTGCTTCACTAGATGAG  
 GAAGAAATGGCAGTACAGCTTTGAGCTTATTTTTGCAATTTGATGAAGTACTCTCTTGGACACAAGGAAAATGTACAGTTACACAAAGTCAAGGAG  
 TATTGTGAAATGGAGAGCCATGAGGAAAGATTGCACAAGTATGCTCAAGAAAGATAAATGAAACTAAGGATGTCATGAAGCGTAAAGCCAGTGA  
 GATTGACAAAAGCAAGATTGAGAAGAAATAGAGGTGAAAAGGAGGTTTCACTGCTGCAATCCATGGTCTGGGAGAATCGACTGGCTTTGGCA  
 GCGACTCAGGCATATCTAGCGGAGGAACTGGTGGTTTTGGTAGTGGTCTGGATTTGGTCTAAGCCCTGACGTAGACACATTTCCACCAAAATCCAA  
 GGGTCTGCCAGCTGCATCTGCTACTGCTCCACCAAAAAGTCTTGGTATGAGCTAGGTAAGAAATCAGAAGACCGACCAATTTCTGGAATCCCTGAAA  
 GCAGAAGGTGAAGTTATTTGCGAGGATGTGAGACCAAGCATTGGTCAAGGCAAAACAGCTGCTGCTCACTAATGATCCCGTCACTTACTGCTGCG  
 AAGAAAAGATTAAATGAACACTAAAGCGTGTGTTGGTGTGACGAACTTGCATGTCAGGGTACTTTGCTCTCAAAATCTGAATCAAGAAAGATGCA  
 TTATCAAGTGCAGATTGAAACCAAGTGTAAATCCAACAATCTCTTCAAAACACCCCAACATGAACAAGGAATGTTTTCTAATGAAAATATCTAG  
 GACTTAAAGATCCAAATAGGCCATTTCCACGGGTCAAGGTGGTGAAGGCTTACTCTTTGAGGTTGGAGAATGCAAACTGCAGATGAGTCAATTTTG  
 CCATGACAATTAACCTGCTGGCTTCAAGTTCTGGAAGCGAAAACCTATGTAATATCGAGTATGAAACCCCTGCACAGATTTGATCTACAAAATGTTGTA  
 ATTTCTGACCCCTCCAGCTCTCAGGGAGGCTCCAAATGTACAACAATAGACGGAGAGTGGAGGATGACCCCAAGAAATCTGTTTTGGAGTGGCT  
 TGACTTCTCATTGACAATTCGAACCGCAGTGGAGCACTAGAATTTGTTGTTCCGGCAGCTGATCCCTGGTCTTCTTCCCAATTTCTGCACGCTTTAC  
 TGCTCAAGAACTTTCAGTGCATGAAGTGTGCAACATTTCCCTATAAAGGTTGGGCTACTCTAAGCATTCTCAAGAACACAGCTGGCCACAG  
 AGACTTCAAGTCTGTGTA

**Fig. S1.** Nucleotide sequences of *N. benthamiana*  $\beta$ '-,  $\gamma$ -, and  $\delta$ -COP genes. The protein coding regions of the corresponding cDNAs are shown.

**A**  $\beta'$ -COP

MDIDKFVFRDCLHLELPDPVRSKAFIPRKQVWVAGADDMFIRVYNYNTMDKVKVFEAHTDYIRCVAVHPT  
 LPYVLSDDMLIKLWDWEKGWLCQIFEGHSHYVMQVTFNPKDTNTFASASLDRTIKIWNLGSPDPNFT  
 LDAHLKGVNCDYFTGGDKPYLITGSDDHTAKVWDYQTKSCVQTLDGHTHNVSACVCFHPGLPIITGSED  
 GTVRIWHATTYRLENTLNYGLERVWAIGYMKHSRRVVIGYDEGTIMVKLGREVPVASMDSGKVIWAKHN  
 EVQTVNIKSIGADYEADGERLPLAVKEMGTCDLYPQSLKHNPNGRFVVVCGDGEYIIYTALAWRNRSFG  
 SALEFVWSSDGEYAVRESTSKIKIFSKNFQEKKISIRPTFSAERIYGGTLLAMCSNDFICFYDWADCRLIRRI  
 DVNVKNLYWADSGDLVAIASDASFYILKYNRDVVAHFDSGRSVDEQGVVEAFELLNEINERVRTGIWVG  
 DCFIYNSSWRLNYCVGGEVTTMFHLDRPMYLLGYLANQSRVFLIDKEFNVVGYTLLLGLIEYKTLVMRGD  
 WDRANEVLPSPKEHHNSVARFLESRGMIEEAEVATDLDYRFELAIQLGKLDIAKEIAVVAQSESKWKQL  
 GDLMSSGRLETAEECLKHANDLSGLLLYSSLGDAEGITELASFAKEHGKNNVAFCLMFLGKVVDECIQL  
 LVDSNRVPEAAFMARSYLPKSVSEIVSIWRKDLKVNQKAAEALADPEEYPNLFEHWQIAHSIEARVAEER  
 GVYPAAADYGNCADRPTTNLVEAFSNMRVDEEPLENGELDHEVAEQNGDEVQEPGEDDIQQEGQEEAV  
 VVDADSTDGAVLVNGNEADEEWGTNTEGKPSYTTSLGSAKTDGSSCSAALMDSLDRMRSVLPVV-

**B**  $\gamma$ -COP

MAQPLVKKDDDRDDEMDYSPFLGIEKGAVLQEARVFNDPQLDARRCSQVITKLLYLLNQGESFTKAEAT  
 GVFFAVTKLFQSKDIGLRRMVYLIKELSPSADEVIIVTSSLMKDMNSRTDMYRANAIRVLCRITDGTLLTQI  
 ERYLKQAIVDKNPVVASAALVSGIHLQTNPEIVKRWSNEVQEAVQSRAALVQFHALALLHQIRQNDRLAV  
 SKLVTSLTKGSVRSPLAQCLLIRYTSQVIRESGISQTGDRPFYDYLESCLRHKAEVMVIFEAARAITELSGVT  
 NRELTPAITVLQFLSSKPVLRFAAVRTLKNVAMTHPMAVTNCNIDMESLISDQNRSIATLAITLLKTGNE  
 SSVDRMLKQITNFMSDIADEFKIVVVEAIRSLCLKFPLKYRSLMNFLSNILREEGGFEYKKAIVDSIVILIRDIP  
 DAKEGGLLHLCEFIEDCEFTYLSTQILHFLGNEGPKTSDPSKYIRYIYNRVILENATVRASAVSTLAKFGALV  
 DSLKPRIFVLLKRCLFSDSDEVDRATLYLNTLGGDGAUVETDEEVKEFLFGSLGVPLTNLETSLKNYEPS  
 EEPFDIHSVPKEVKSQPLSEKKAPGKKPTGLAAPPVAPTSTVDAYERLLSSIPEFASYGKLFKSSAPVELT  
 EAETEVAVNVVKHIFDNHIVFQYNCTNTIPEQLLENTVIVDASDAEEFSEVASKPLKSLPYDTPGQTFVTF  
 EKPEGVPAVGKFSNMLRFIVKEVDPSTGEAEDDGEVEDEYQLEDLEAVSADYVLKVGVSNFRNAWESLG  
 PDCEKVDEYGLGPRESLAEAVNTVIDLLGMQPCEGTEVVPSNSRSHTCLLSGVYLGGVKVLVRLSFGVD  
 GPKEVAMKLAVRSEDISVSDAIHEIVASG-

**C**  $\delta$ -COP

MVVLAASIISKSGKALVSRQFVDMRSRIRIEGYLAAPFKLVGTGKQHTYIETDNVRYVYQPIESLYLLLVTNK  
 QSNILEDLETLRLLSKLVPEYCHSLDEEGIGSTAFELIFAFDEVISLGHKENVTVTQVKQYCEMESHEERLH  
 KLVLQNKINETKDVMKRKASEIDKSKIEKNRGEKGGFMSLQSMGSGRIDTGFSGSDSGISSGGTGGFGSG  
 SGFGLSPDVDTFSTKSKGRPAASATAPPKGLGMQLGKNQKTDQFLESLSKAEGEVIVEDVRPSIGQAKPA  
 AAPLTDVTLTVEEKINVTLKRGGVSNFDVQGTLSLQILNQEDAFIQVQIETSGNPTILFKTHPNMKNELF  
 SNENILGLKDPNRPFPPTGQGGDGVSLLRWRMQTADESILPLTINCWPSVSGSETYVNIETPAQI  
 DLQNVVISVPLPALREAPNVQQIDGEWRYDPRNSVLEWSVLLIDNSNRSGALEFVPAADPSVFFPISAR  
 FTASRTFSDLKVVNILPIKGGPTPKHSQRTQLATETYQVV-

**Fig. S2.** Amino acid sequences of *N. benthamiana*  $\beta'$ -,  $\gamma$ -, and  $\delta$ -COP proteins.

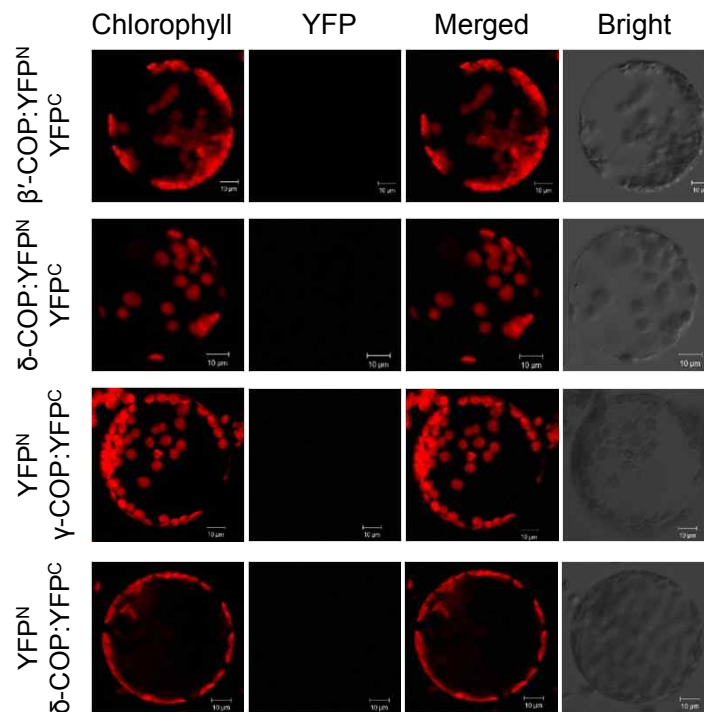

**Fig. S3.** BiFC controls.

$\beta'$ -COP:YFP<sup>N</sup> and YFP<sup>C</sup>,  $\delta$ -COP:YFP<sup>C</sup> and YFP<sup>C</sup>, YFP<sup>N</sup> and  $\gamma$ -COP:YFP<sup>C</sup>, and YFP<sup>N</sup> and  $\delta$ -COP:YFP<sup>C</sup> were expressed together in *N. benthamiana* leaves via agroinfiltration, and the YFP signal in leaf protoplasts was observed by confocal microscopy. YFP fluorescence was not observed in any of these combinations of gene expression.

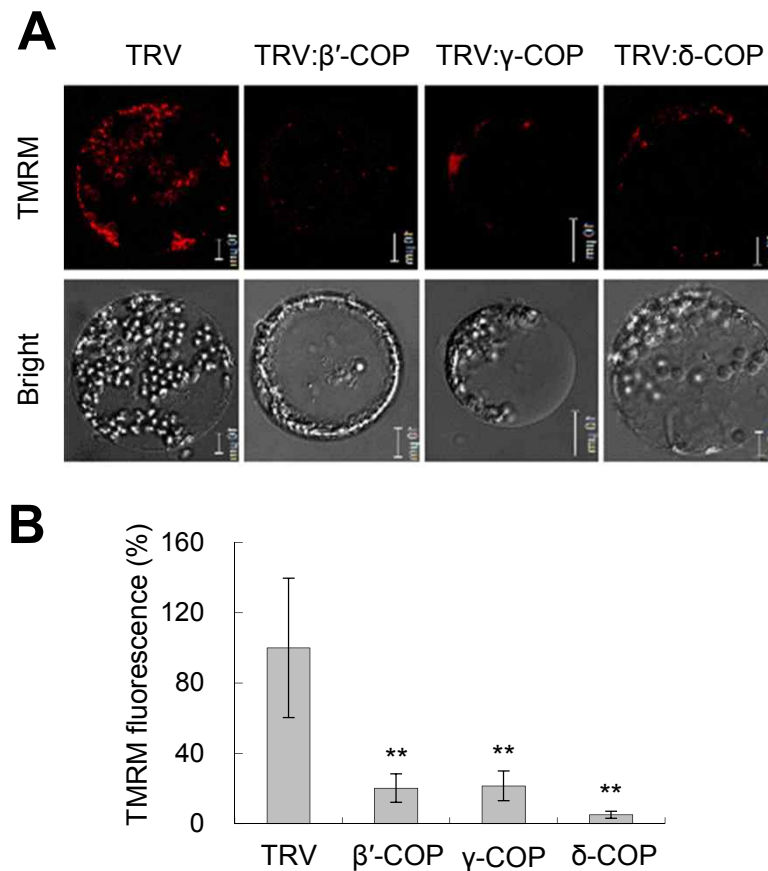

**Fig. S4.** Mitochondrial membrane potential in leaf protoplasts of  $\beta'$ -COP,  $\gamma$ -COP, and  $\delta$ -COP VIGS plants.

(A) Tetramethylrhodamine methyl ester (TMRM) staining of TRV, TRV: $\beta'$ -COP, TRV: $\gamma$ -COP, and TRV: $\delta$ -COP VIGS plants at 15 DAI. Scale bars = 10  $\mu$ m.

(B) TMRM fluorescence of protoplasts from the VIGS lines was quantified by pixel intensity. Data points represent means  $\pm$  SD of 30 individual protoplasts. Asterisks denote statistical significance of the differences between COPI VIGS and TRV control samples: \*,  $P \leq 0.05$ ; \*\*,  $P \leq 0.01$ .

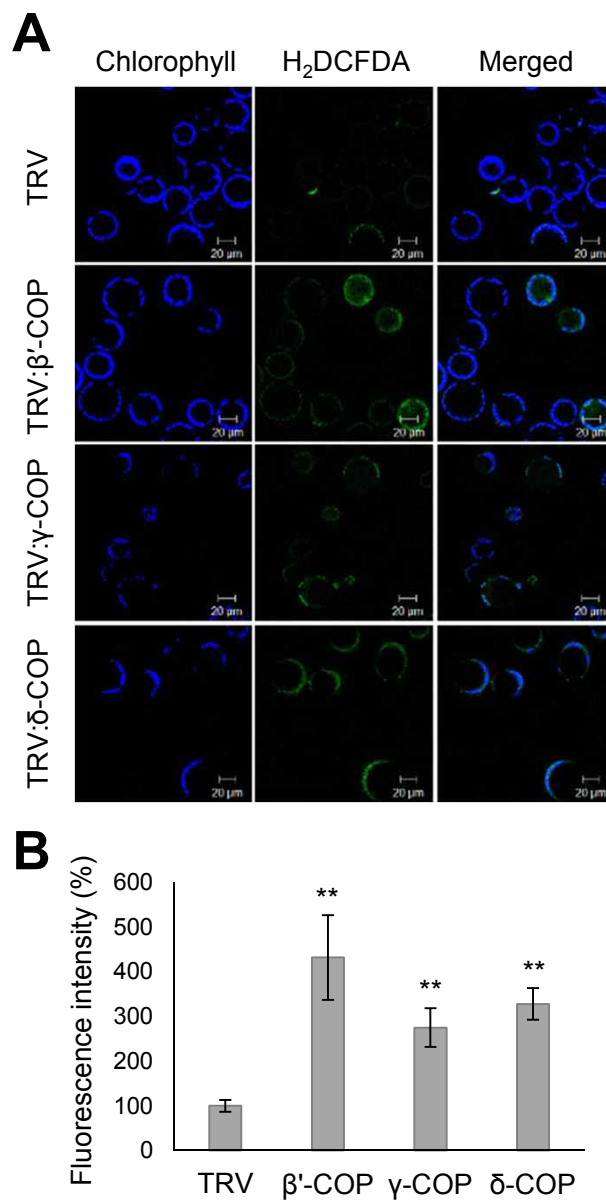

**Fig. S5.** H<sub>2</sub>DCFDA staining to detect reactive oxygen species (ROS).

Cellular ROS levels of TRV control, TRV:β'-COP, TRV:γ-COP, and TRV:δ-COP were detected (A) and quantified (B) by H<sub>2</sub>DCFDA fluorescence levels at 15 DAI. Chlorophyll autofluorescence is pseudo-colored blue. Data points represent means ± SD of 30 individual protoplasts. Asterisks denote statistical significance of the differences between COPI VIGS and TRV control samples: \*, P ≤ 0.05; \*\*, P ≤ 0.01. Scale bars = 20 μm.

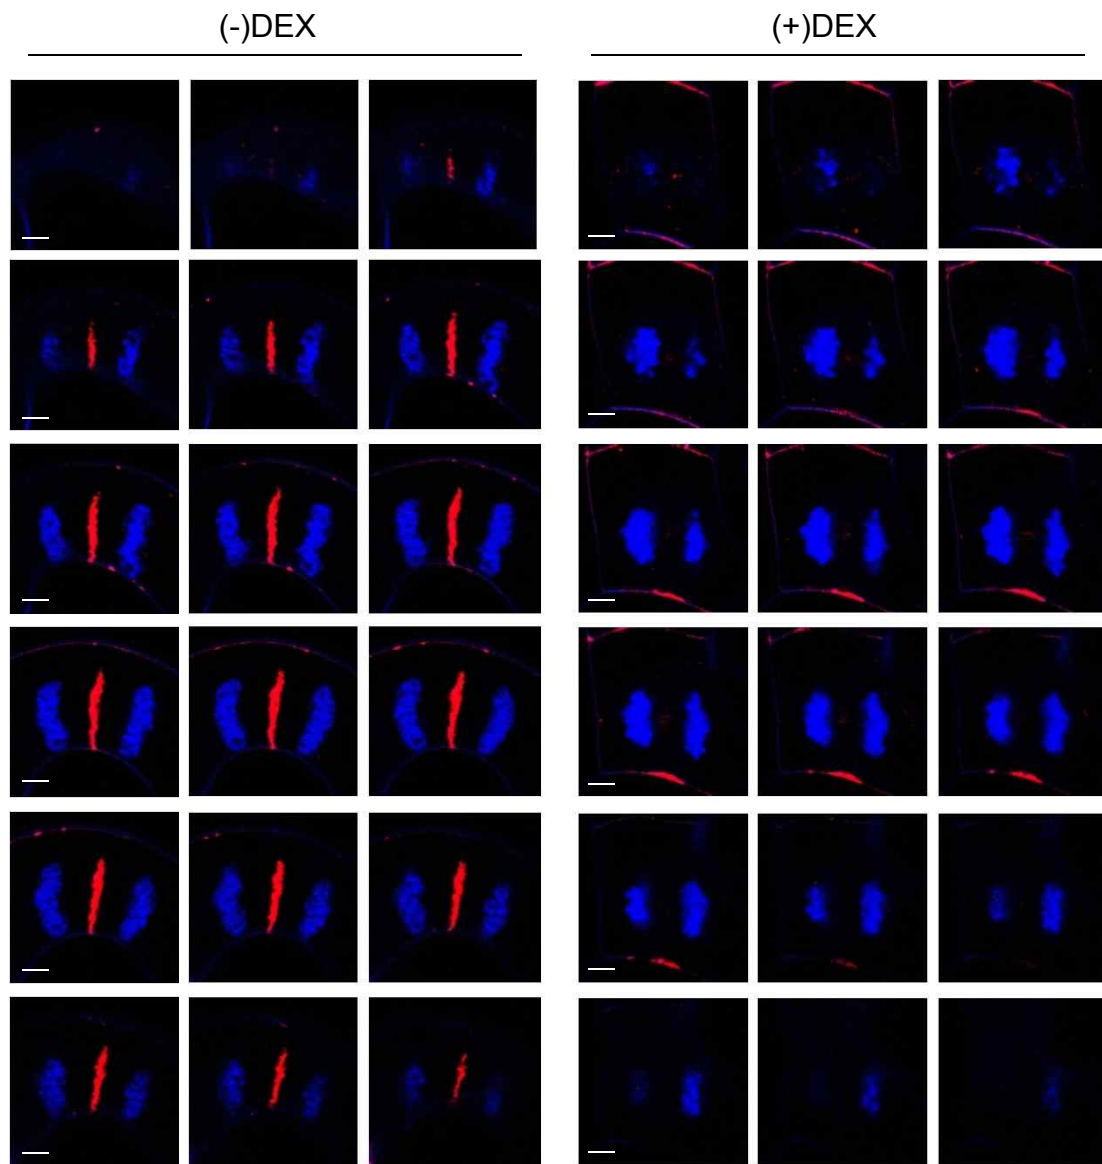

**Fig. S6.** Visualization of the newly forming cell plate during cytokinesis. The DEX-inducible  $\beta'$ -COP RNAi BY-2 cells were treated with ethanol (-DEX) or 15  $\mu$ M DEX (+DEX) and stained with DAPI (blue) and FM4-64 (red) for visualization of the nuclei and the cell plate, respectively. Confocal microscopy revealed images of consecutive serial sections of a BY-2 cell undergoing cytokinesis. Scale bars = 10  $\mu$ m.
